# Supplementary material for: Combined metabolome and transcriptome profiling provides new insights into diterpene biosynthesis in S. pomifera glandular trichomes
Source: PubMed Central journal article supplement (PMC4647624; doi:10.1186/s12864-015-2147-3), 2015-11-14

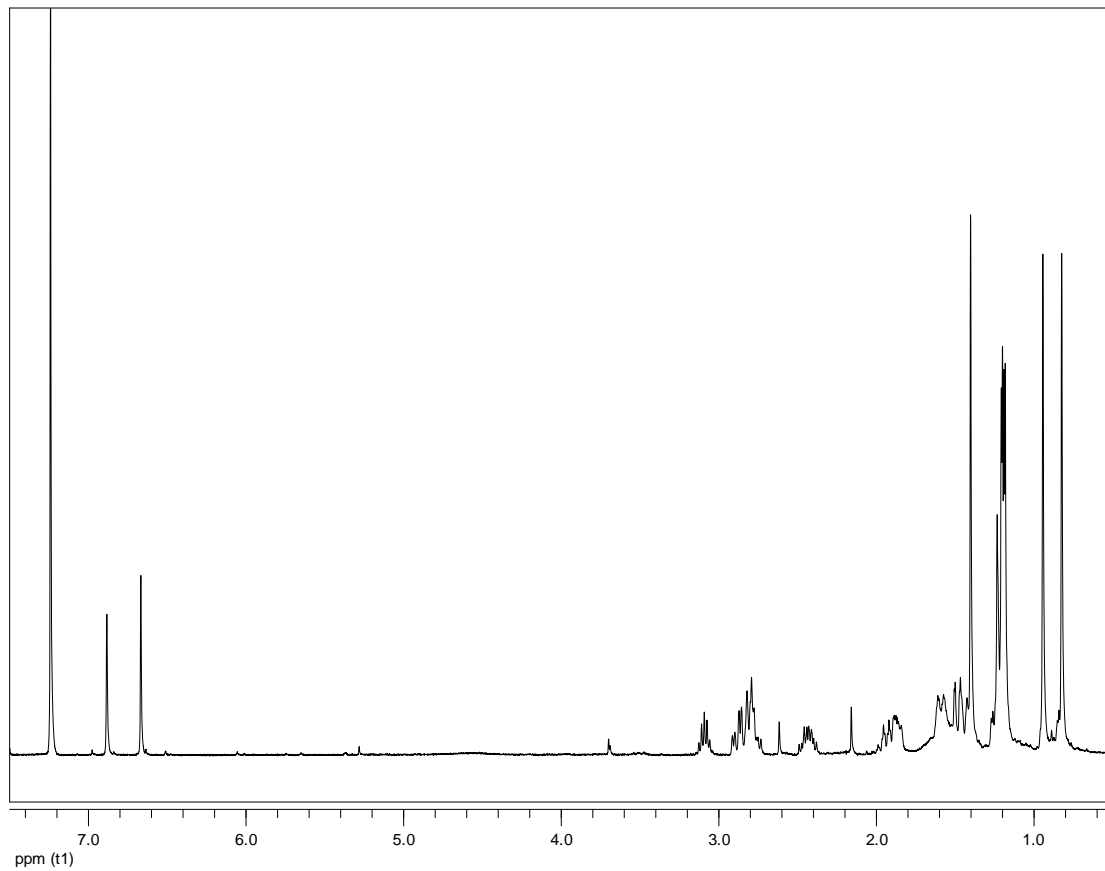

Supplement: 12864_2015_2147_MOESM3_ESM.pdf [file 12864_2015_2147_MOESM3_ESM.pdf]
