# Supplementary material for: Combined metabolome and transcriptome profiling provides new insights into diterpene biosynthesis in S. pomifera glandular trichomes
Source: PubMed Central journal article supplement (PMC4647624; doi:10.1186/s12864-015-2147-3), 2015-11-14
Supplement: 12864_2015_2147_MOESM9_ESM.pdf [file 12864_2015_2147_MOESM9_ESM.pdf]

| <i>M. spicata</i> contig | Length          | FPKM            | Top BLAST NR hit                                                                                                         |
|--------------------------|-----------------|-----------------|--------------------------------------------------------------------------------------------------------------------------|
| c60211_g2                | 757.34          | 42,008.81       | hypothetical protein, partial [MENSF MC-2012]                                                                            |
| c51259_g1                | 6,422.00        | 24,901.96       | hypothetical protein MTR_5g050970 [MEDTR]                                                                                |
| c59767_g1                | 647.64          | 20,343.79       | hypothetical protein ppa013682mg [PRUPE]                                                                                 |
| c53233_g1                | 1,921.00        | 10,351.68       | RecName: Full=Cytochrome P450 71D18; AltName: Full=(-)-(4S)-Limonene-6-hydroxylase [MENGR]                               |
| c71666_g1                | 397.00          | 6,539.42        | no hit                                                                                                                   |
| c40316_g1                | 384.00          | 6,162.27        | hypothetical protein, partial [MENSF MC-2012]                                                                            |
| c63826_g1                | 972.63          | 5,910.47        | hypothetical protein mgv1a012999mg [ERYGU]                                                                               |
| c94072_g1                | 532.00          | 5,348.88        | RecName: Full=Cytochrome P450 71D94 [MENGR]                                                                              |
| c61069_g1                | 2,035.00        | 5,178.67        | (-)-limonene 3-hydroxylase-like CYP450-dependent oxygenase [MENSF]                                                       |
| c64299_g1                | 1,496.98        | 4,682.90        | hypothetical protein MIMGU_mgv1a020040mg, partial [ERYGU]                                                                |
| c62984_g1                | 2,060.82        | 4,642.08        | 4S-limonene synthase [MENSF]                                                                                             |
| c57278_g1                | 680.00          | 4,559.92        | no hit                                                                                                                   |
| <b>c60448_g1</b>         | <b>896.80</b>   | <b>4,088.72</b> | <b>PREDICTED: ribulose biphosphate carboxylase small chain, chloroplastic-like [ERYGU]</b>                               |
| <b>c61167_g3</b>         | <b>1,176.35</b> | <b>3,722.43</b> | <b>PREDICTED: chlorophyll a-b binding protein of LHCI type 1 [CUCME]</b>                                                 |
| c63697_g2                | 798.19          | 3,594.53        | hypothetical protein MIMGU_mgv1a016108mg [ERYGU]                                                                         |
| c6798_g1                 | 320.00          | 3,529.31        | no hit                                                                                                                   |
| c64305_g2                | 1,465.53        | 3,439.35        | RecName: Full=8-hydroxyquercetin 8-O-methyltransferase; AltName: Full=Flavonol 8-O-methyltransferase [Mentha x piperita] |

|           |          |          |                                                                   |
|-----------|----------|----------|-------------------------------------------------------------------|
| c80200_g1 | 686.00   | 3,385.59 | hypothetical protein<br>MIMGU_mgv1a015414mg<br>[ERYGU]            |
| c53657_g3 | 1,672.00 | 3,209.08 | hypothetical protein<br>MIMGU_mgv1a007849mg<br>[ERYGU]            |
| c59286_g1 | 938.52   | 2,923.70 | Cu/Zn superoxide dismutase<br>family protein [POPTR]              |
| c61908_g2 | 844.07   | 2,876.72 | no hit                                                            |
| c59923_g1 | 1,583.00 | 2,840.71 | PREDICTED: uncharacterized<br>protein LOC104228662<br>[NICSI]     |
| c63072_g1 | 1,769.62 | 2,819.34 | hypothetical protein<br>MIMGU_mgv1a023994mg<br>[ERYGU]            |
| c55645_g1 | 1,936.00 | 2,756.41 | terpene synthase 3 [ORIVU]                                        |
| c59941_g1 | 565.06   | 2,754.35 | (E)-beta farnesene synthase<br>[MENAR]                            |
| c47337_g1 | 809.00   | 2,744.03 | no hit                                                            |
| c60831_g1 | 1,163.00 | 2,637.39 | hypothetical protein<br>JCGZ_03321 [JATCU]                        |
| c65365_g1 | 2,813.00 | 2,529.49 | hypothetical protein<br>JCGZ_23012 [JATCU]                        |
| c62174_g1 | 865.05   | 2,415.77 | hypothetical protein<br>MIMGU_mgv1a009314mg<br>[ERYGU]            |
| c64692_g1 | 1,454.00 | 2,354.71 | flavonoid 7-O-<br>methyltransferase [Mentha x<br>piperita]        |
| c50263_g1 | 761.00   | 2,063.20 | PREDICTED: axial regulator<br>YABBY 5-like isoform X1<br>[NICSI]  |
| c46264_g1 | 309.00   | 2,056.55 | hypothetical protein<br>MIMGU_mgv11b0121611mg,<br>partial [ERYGU] |
| c53820_g1 | 821.45   | 1,943.53 | Ubiquitin<br>supergroup,Ribosomal protein<br>L40e [THECC]         |
| c69178_g1 | 526.68   | 1,905.85 | elongation factor alpha5,<br>partial [MAIZE]                      |
| c63283_g1 | 1,043.00 | 1,850.43 | ferredoxin-NADP(+)<br>reductase, partial [OCIBA]                  |
